# Supplementary material for: Repurposing Anti-diabetic Drugs to Cripple Quorum Sensing in Pseudomonas aeruginosa
Source: PubMed Central journal article supplement (PMC7569791; doi:10.3390/microorganisms8091285), 2020-08-22
Supplement: microorganisms-08-01285-s001.pdf [file microorganisms-08-01285-s001.pdf]

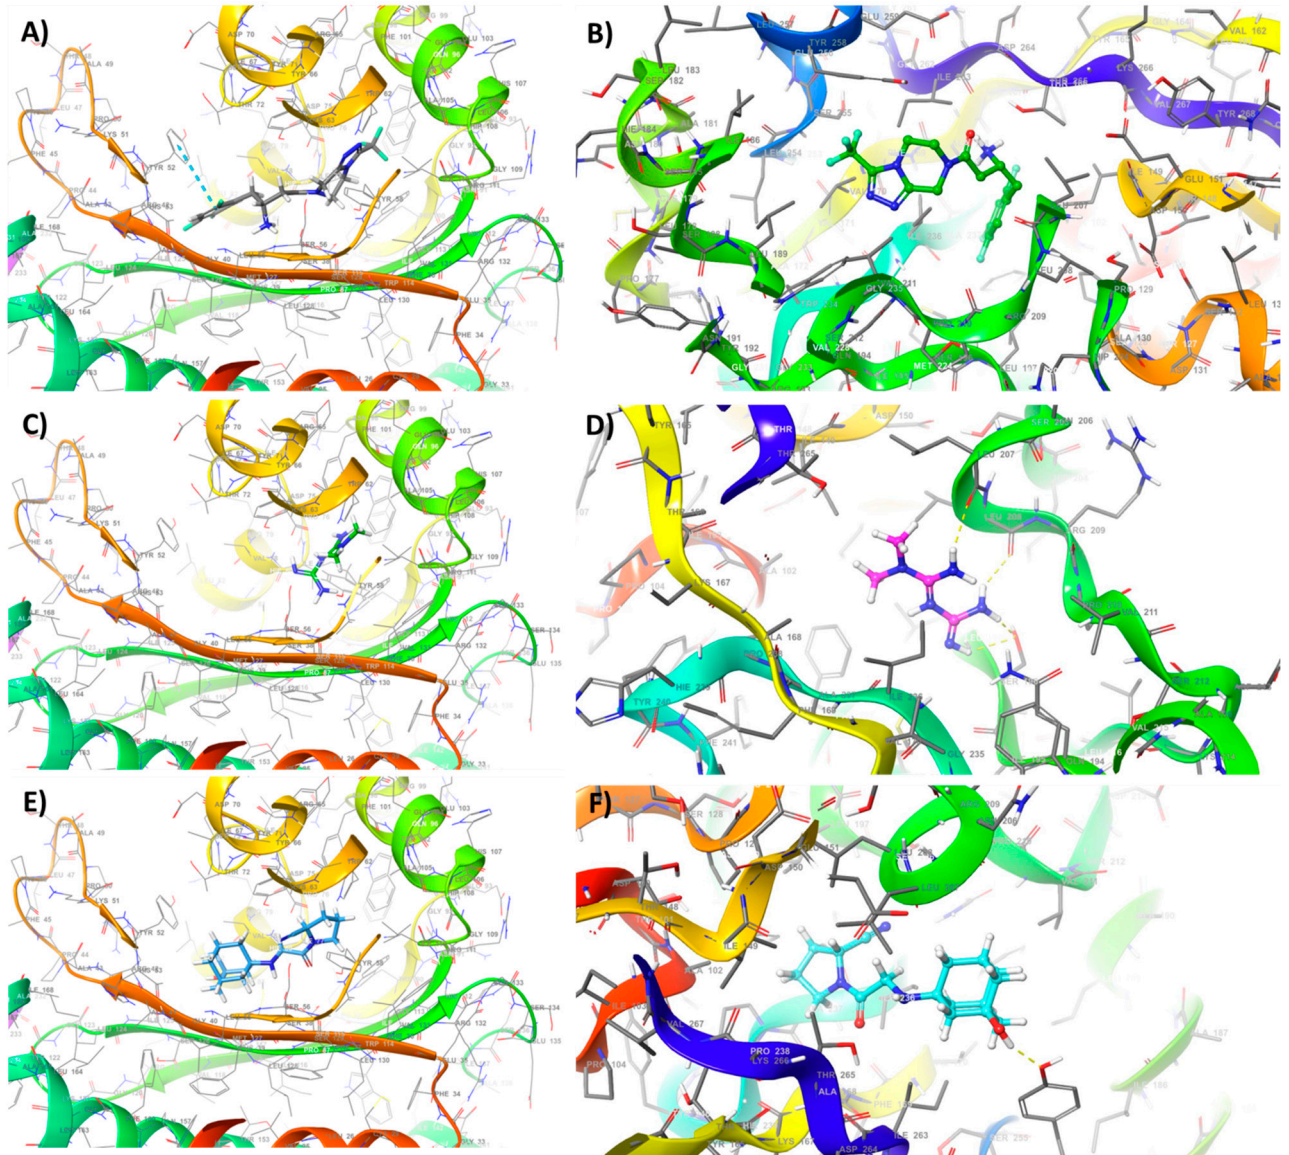

**Supplementary Figure S1.** Docking study of tested anti-diabetic drugs into *P. aeruginosa* QS receptors QscR and PqsR. QscR receptor 3D binding mode of (A) sitagliptin (gray), (C) metformin (green) and (E) vildagliptin (blue). 3D binding mode of (B) sitagliptin (green) with (D) metformin (purple) and (F) vildagliptin (greenish) with amino acids in the active sites of pqsR. .
